# Supplementary material for: Development of stretchable metallic glass electrodes
Source: Royal Society of Chemistry journal article supplement (doi:10.1039/d0nr07307e), 2021-01-01
Supplement: d0nr07307e1.pdf [file d0nr07307e1.pdf]

## **Development of stretchable metallic glass electrodes**

Haijie Xian<sup>1,2</sup>, Lichao Li<sup>1,3</sup>, Ping Wen<sup>1,2</sup>, Haiyang Bai<sup>1,2,3,\*</sup>, and Weihua Wang<sup>1,2,3,4,\*</sup>

Yanhui Liu<sup>1,2,3,4,\*</sup>

<sup>1</sup> Institute of Physics, Chinese Academy of Sciences, Beijing 100190, China

<sup>2</sup> Songshan Lake Materials Laboratory, Dongguan, Guangdong 523808, China

<sup>3</sup> Beijing Advanced Innovation Center for Materials Genome Engineering, University of Science and Technology Beijing, Beijing 100083, China

<sup>4</sup> Center of Materials Science and Optoelectronics Engineering, University of Chinese Academy of Sciences, Beijing 100049, China

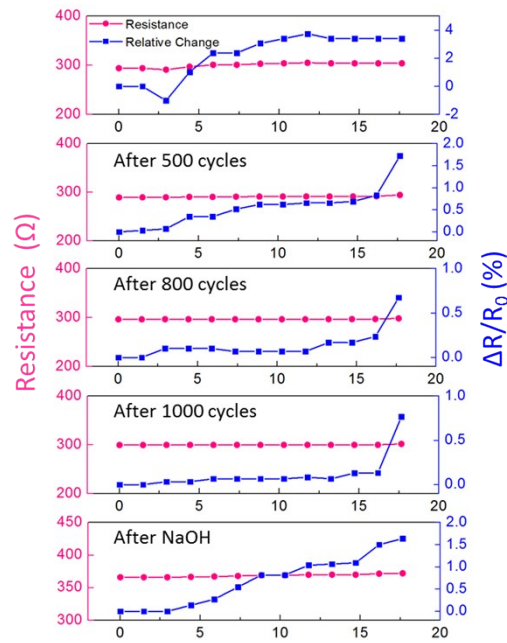

**Figure S1** Change of electrical resistance with applied strain for biaxial MG-electrode after stretching-unstretching cycles and immersion in 1.5 mol/L NaOH solution for 24 hours.

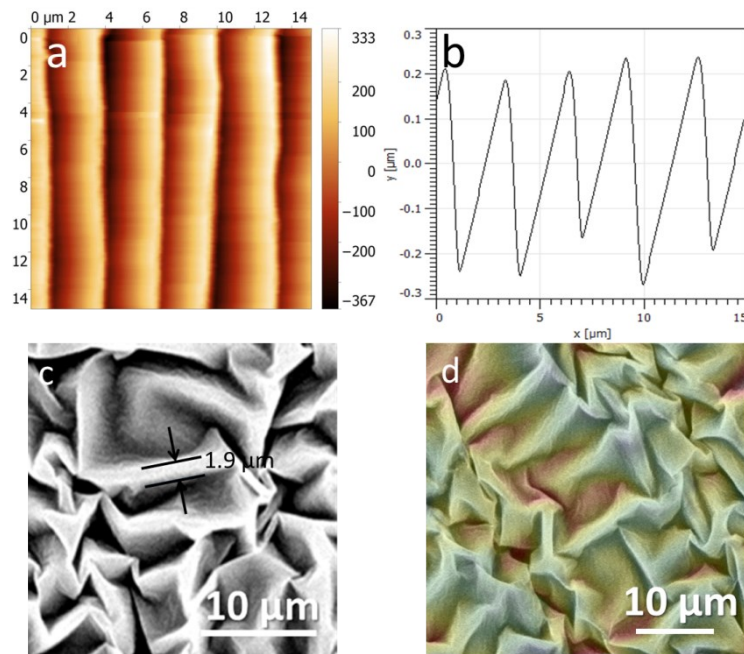

**Figure S2** AFM image (a) and AFM cross-section profile (b) of the uniaxial MG-electrode with healing layer. SEM image (c) and reconstructed height map image (d) of the biaxial MG-electrode.

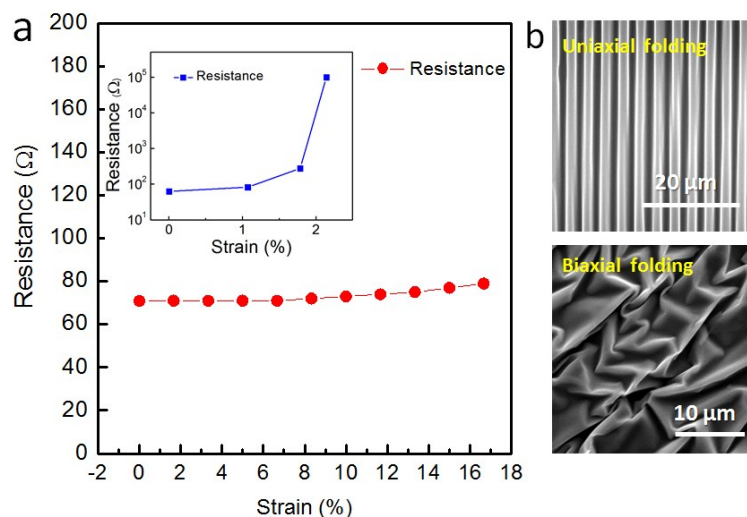

**Figure S3** (a) Change of resistance with applied strain for  $\text{Pd}_{81}\text{Si}_{19}$  flat MG film (inset) and  $\text{Pd}_{81}\text{Si}_{19}$  MG-electrode achieved by biaxial folding. (b) SEM images of  $\text{Fe}_{78}\text{Si}_9\text{B}_{13}$  metallic glass wrinkle structures achieved by uniaxial and biaxial folding.

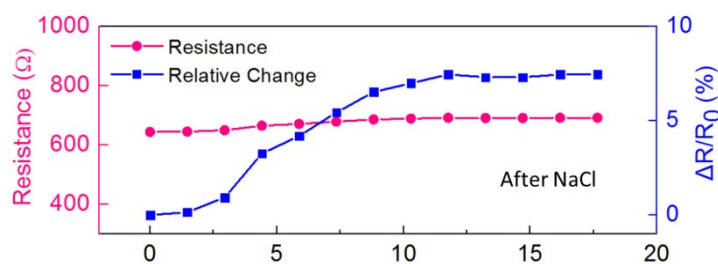

**Figure S4** Electrical resistance change with stretching strain for biaxial MG-electrode after immersion in 1.5 mol/L NaOH solution for 24 hours.

**Table S1** Summary of electronic performance of reported stretchable electrodes.

| Conductive materials                   | Conductivity (S/cm) | Resistance change at 15% stretching strain (%) | Transparency (Yes/No) | Reference |
|----------------------------------------|---------------------|------------------------------------------------|-----------------------|-----------|
| Ag nanoparticles and graphene oxide    | 3012                | 115.1%                                         | No                    | [1]       |
|                                        | 2600                | 73.3%                                          |                       |           |
| Ag nanoflowers                         | 4000                | 344%                                           | No                    | [2]       |
| Ag nanowires                           | 4018                | 14.5%                                          | No                    | [3]       |
|                                        | 1500                | 12%                                            |                       |           |
| Ag salts                               | 22000               | 275%                                           | No                    | [4]       |
|                                        | 7040                | 260%                                           |                       |           |
| Ag flakes                              | 542                 | 10.5%                                          | No                    | [5]       |
| Ag-Au nanowires                        | 38800               | 20.8%                                          | No                    | [6]       |
|                                        | 69400               | 27%                                            |                       |           |
|                                        | 41850               | 16.4%                                          |                       |           |
| Au nanoparticles                       | 16000               | 128%                                           | No                    | [7]       |
|                                        | 170000              | 126%                                           |                       |           |
| Au nanoparticles                       | 11000               | 53.6%                                          | No                    | [8]       |
|                                        | 1800                | 189.3%                                         |                       |           |
| Carbon nanotube and silver             | 5710                | 280.6%                                         | No                    | [9]       |
| Poly(3,4-ethylenedioxythiophene) PEDOT | 40                  | 30%                                            | No                    | [10]      |
| PEDOT and graphene oxide               | 1010                | 670%                                           | Yes                   | [11]      |
| Carbon nanotube                        | 0.83                | 1%                                             | Yes                   | [12]      |
|                                        | 1.08                | 0.5%                                           | No                    |           |
| Carbon nanotube                        | 2000                | 12.5%                                          | Yes                   | [13]      |
| Carbon nanotube                        | 1                   | 5%                                             | No                    | [14]      |
| Carbon nanotube                        | 10                  | 3%                                             | No                    | [15]      |
| Poly(3-butylthiophene-2,5-diyl) P3BT   | 0.0022              | 2%                                             | Yes                   | [16]      |
|                                        | 0.0022              | 16%                                            |                       |           |
|                                        | 4.002               | Almost no change (0.001%)                      |                       |           |
| Carbon nanotube                        | 342                 | 2.55%                                          | No                    | [17]      |
| Graphene                               | 1800                | 50%                                            | Yes                   | [18]      |
| Graphene foam                          | 10                  | 7.5%                                           | Yes                   | [19]      |
| Graphene                               | 5000                | 8.1%                                           | Yes                   | [20]      |
| Ag nanoparticles                       | 5400                | 6%                                             | No                    | [21]      |
| Graphene                               | 16000               | 25%                                            | Yes                   | [22]      |
| Ag nanoparticles                       | 4919                | 96.8%                                          | No                    | [23]      |
|                                        | 3727                | 101.7%                                         |                       |           |

|                                                                    |       |        |     |           |
|--------------------------------------------------------------------|-------|--------|-----|-----------|
| Ag nanowires                                                       | 46700 | 174.7% | No  | [24]      |
|                                                                    | 40000 | 100%   |     |           |
| Au-TiO <sub>2</sub> nanowires                                      | 16000 | 100%   | No  | [25]      |
| Cu-Ag nanowires                                                    | 1220  | 3.6%   | No  | [26]      |
| Ag flakes                                                          | 738   | 27.2%  | No  | [27]      |
| Carbon nanotube                                                    | 57    | 42.5%  | No  | [28]      |
| poly(3,4-ethylenedioxythiophene) polystyrene sulfonate (PEDOT:PSS) | 0.127 | 4%     | No  | [29]      |
| Au nanosheets                                                      | 1667  | 5.4%   | No  | [30]      |
|                                                                    | 10000 | 30%    |     |           |
|                                                                    | 15385 | 30%    |     |           |
| Au nanomeshes                                                      | 18868 | 6.9%   | No  | [31]      |
| Uniaxial MG-Electrode                                              | 108   | 2.3%   | Yes | This work |
| Biaxial MG-Electrode                                               | 1014  | 4.3%   | No  | This work |

## Reference

- [1] Y. Yoon, K. Samanta, H. Lee, K. Lee, A. P. Tiwari, J. Lee, J. Yang and H. Lee, *Scientific reports*, 2015, **5**, 14177.
- [2] R. Ma, B. Kang, S. Cho and S. Baik, *ACS nano*, 2015, **9**, 10876–10886.
- [3] Y. Cheng, R. Wang, J. Sun and L. Gao, *ACS nano*, 2015, **9**, 3887-3895.
- [4] M. Hu, X. Cai, Q. Guo, B. Bian, T. Zhang and J. Yang, *ACS nano*, 2016, **10**, 396-404.
- [5] S. H. Kim, S. Jung, I. S. Yoon, C. Lee and Y. Oh, *Advanced materials*, 2018, **30**, 1800109.
- [6] S. Choi, S. I. Han, D. J. Jung, H. J. Hwang, C. Lim, S. Bae, O. K. Park, C. M. Tschabrunn, M. Lee, S. Y. Bae, J. W. Yu, J. H. Ryu, S.-W. Lee, K. Park, P. M. Kang, W. B. Lee, R. Nezafat, T. Hyeon and D.-H. Kim, *Nature nanotechnology*, 2018, **13**, 1048-1056.
- [7] S. Lee, Y. Song, Y. Ko, Y. Ko, J. Ko, C. H. Kwon, J. Huh, S. W. Kim, B. Yeom and J. Cho, *Advanced materials*, 2019, 1906460
- [8] Y. Kim, J. Zhu, B. Yeom, M. Di Prima, X. Su, J. G. Kim, S. J. Yoo, C. Uher

- and N. A. Kotov, *Nature*, 2013, **500**, 59-63.
- [9] K. Y. Chun, Y. Oh, J. Rho, J. H. Ahn, Y. J. Kim, H. R. Choi and S. Baik, *Nature nanotechnology*, 2010, **5**, 853-857.
- [10] M. Sasaki, B. C. Karikkineth, K. Nagamine, H. Kaji, K. Torimitsu, M. Nishizawa, *Advanced Healthcare Materials*, 2014, 201400209.
- [11] Y. G. Seol, T. Q. Trung, O. J. Yoon, I. Y. Sohn and N. E. Lee, *J Mater Chem*, 2012, **22**, 23759-23766.
- [12] K. H. Kim, M. Vural and M. F. Islam, *Advanced materials*, 2011, **23**, 2865-2869.
- [13] L. Cai, J. Z. Li, P. S. Luan, H. B. Dong, D. Zhao, Q. Zhang, X. Zhang, M. Tu, Q. S. Zeng, W. Y. Zhou and S. S. Xie, *Advanced Functional Materials*, 2012, **22**, 5238-5244.
- [14] M. K. Shin, J. Oh, M. Lima, M. E. Kozlov, S. J. Kim and R. H. Baughman, *Advanced materials*, 2010, **22**, 2663-2667.
- [15] L. Lin, S. Liu, S. Fu, S. Zhang, H. Deng and Q. Fu, *Small*, 2013, **9**, 3620-3629.
- [16] Y. S. Guan, Z. Zhang, Y. Tang, J. Yin and S. Ren, *Advanced materials*, 2018, **30**, e1706390.
- [17] W. Weng, Q. Sun, Y. Zhang, S. He, Q. Wu, J. Deng, X. Fang, G. Guan, J. Ren and H. Peng, *Advanced materials*, 2015, **27**, 1363-1369.
- [18] K. S. Kim, Y. Zhao, H. Jang, S. Y. Lee, J. M. Kim, K. S. Kim, J. H. Ahn, P. Kim, J. Y. Choi and B. H. Hong, *Nature*, 2009, **457**, 706-710.
- [19] Z. Chen, W. Ren, L. Gao, B. Liu, S. Pei and H. M. Cheng, *Nature materials*, 2011, **10**, 424-428.
- [20] N. Liu, A. Chortos, T. Lei, L. Jin, T. R. Kim, W. G. Bae, C. Zhu, S. Wang, R. Pfattner, X. Chen, R. Sinclair and Z. Bao, *Science advances*, 2017, **3**, e1700159.
- [21] M. Park, J. Im, M. Shin, Y. Min, J. Park, H. Cho, S. Park, M. B. Shim, S. Jeon, D. Y. Chung, J. Bae, J. Park, U. Jeong and K. Kim, *Nature nanotechnology*, 2012, **7**, 803-809.
- [22] J. Y. Hong, W. Kim, D. Choi, J. Kong and H. S. Park, *ACS nano*, 2016, **10**, 9446-9455.

- [23] Matsuhisa, D. Inoue, P. Zalar, H. Jin, Y. Matsuba, A. Itoh, T. Yokota, D. Hashizume and T. Someya, *Nature materials*, 2017, **16**, 834-840.
- [24] J. Liang, K. Tong and Q. Pei, *Advanced materials*, 2016, **28**, 5986-5996.
- [25] K. Tybrandt, D. Khodagholy, B. Dielacher, F. Stauffer, A. F. Renz, G. Buzsaki and J. Voros, *Advanced materials*, 2018, **30**, 1706520.
- [26] M. J. Catenacci, C. Reyes, M. A. Cruz and B. J. Wiley, *ACS nano*, 2018, **12**, 3689-3698.
- [27] N. Matsuhisa, M. Kaltenbrunner, T. Yokota, H. Jinno, K. Kuribara, T. Sekitani and T. Someya, *Nature communications*, 2015, **6**, 7461.
- [28] T. Sekitani, Y. Noguchi, K. Hata, T. Fukushima, T. Aida and T. Someya, *Science*, 2008, **321**, 1468-1472.
- [29] V. R. Feig, H. Tran, M. Lee and Z. Bao *Nature communications*, 2018, **9**, 2740
- [30] G. D. Moon, G. H. Lim, J. H. Song, M. Shin, T. Yu, B. Lim and U. Jeong, *Advanced materials*, 2013, **25**, 2707-2712.
- [31] A. Miyamoto, S. Lee, N. F. Cooray, S. Lee, M. Mori, N. Matsuhisa, H. Jin, L. Yoda, T. Yokota, A. Itoh, M. Sekino, H. Kawasaki, T. Ebihara, M. Amagai and T. Someya, *Nature nanotechnology*, 2017, **12**, 907-913.
